# Supplementary material for: A Comparative Study of Koizumi and Longa Methods of Intraluminal Filament Middle Cerebral Artery Occlusion in Rats: Early Corticosterone and Inflammatory Response in the Hippocampus and Frontal Cortex
Source: MDPI journal article supplement (doi:10.3390/ijms222413544), 2021-12-17
Supplement: s1 [file s1]

Supplementary figures to the manuscript "A Comparative Study of Koizumi and Longa Methods of Intraluminal Filament Middle Cerebral Artery Occlusion in Rats: Early Corticosterone and Inflammatory Response in the Hippocampus and Frontal Cortex" by Mikhail V. Onufriev, Yulia V. Moiseeva, Marina A. Zhanina, Natalia A. Lazareva, Natalia V. Gulyaeva

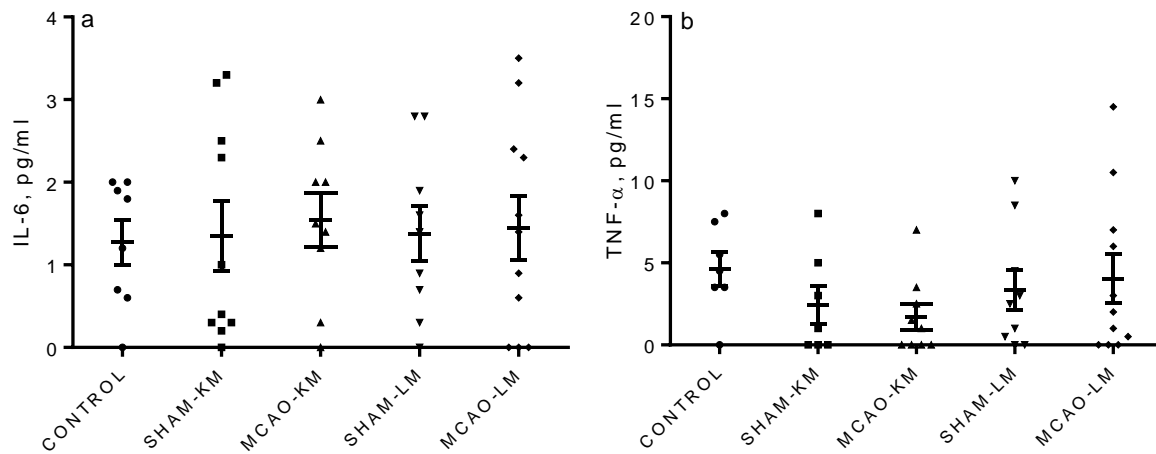

**Figure S1. Blood levels of IL6 (a) and TNF $\alpha$  (b) in MCAO-KM and MCAO-LM groups 3 days after surgery.** a, IL6, pg/ml. b, TNF $\alpha$ , pg/ml. No significant differences between groups have been detected.

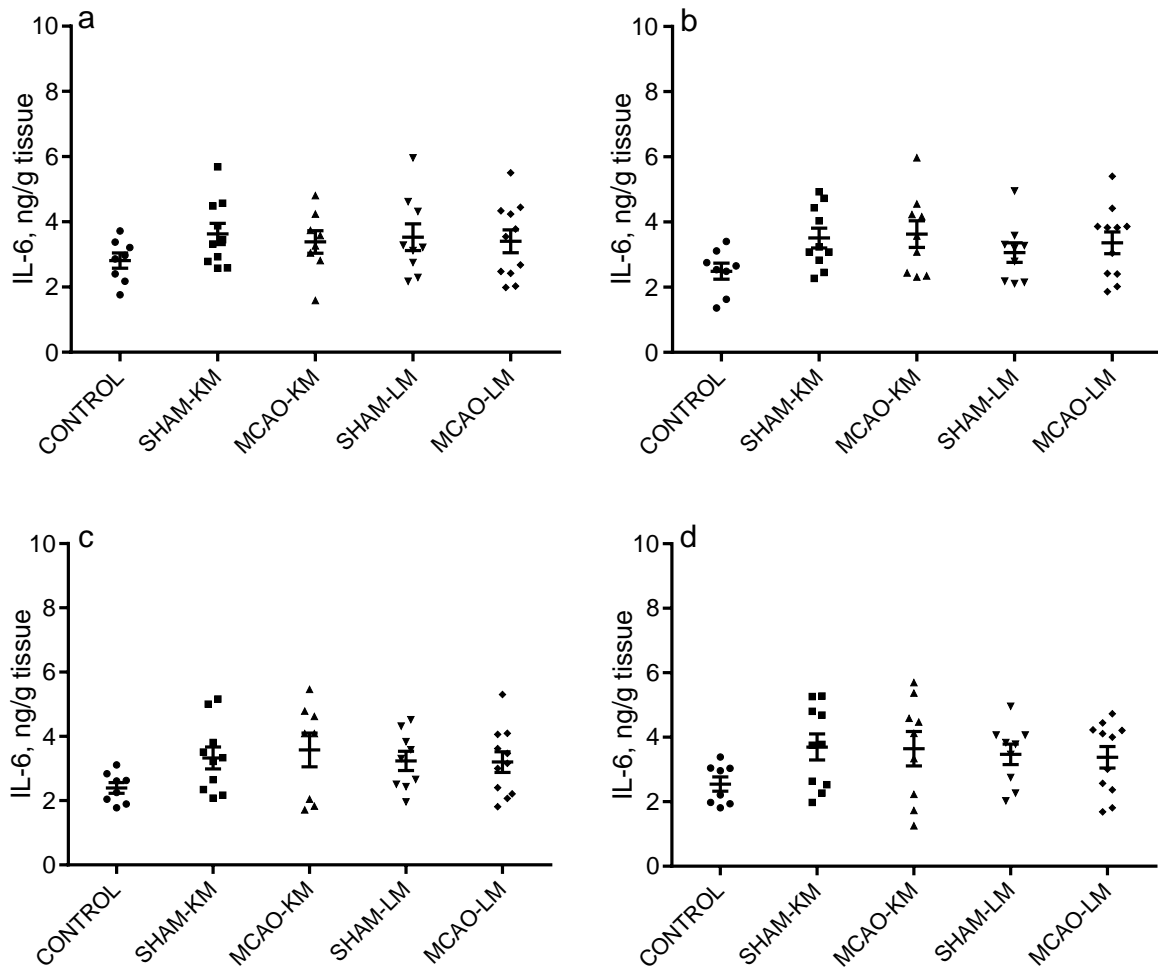

**Figure S2. IL6 levels in the hippocampus (a, b) and FC (c, d) in MCAO-KM and MCAO-LM groups 3 days after surgery.** a, ipsilateral hippocampus. b, contralateral hippocampus. c, ipsilateral FC. d, contralateral FC. a-d, IL6, ng/g tissue. No significant differences between groups have been detected.

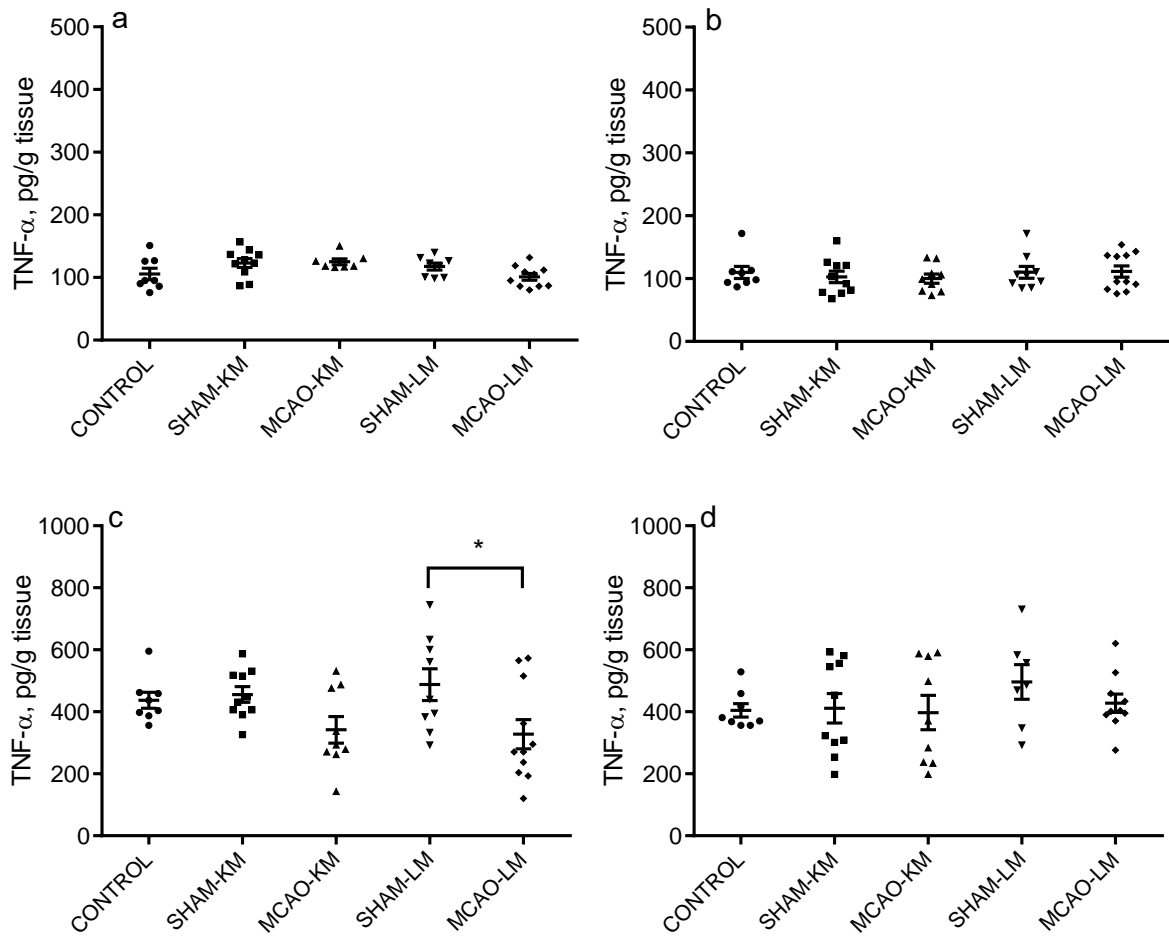

**Figure S3. TNF $\alpha$  levels in the hippocampus (a, b) and FC (c, d) in MCAO-KM and MCAO-LM groups 3 days after surgery.** a, ipsilateral hippocampus. b, contralateral hippocampus. c, ipsilateral FC. d, contralateral FC. a-d, TNF $\alpha$ , ng/g tissue. \*-  $p < 0.05$ , from respective sham operated group.
